# Supplementary material for: Tracing Superior and Late-Leafing Genotypes in their Origin Center for Managing Late-Spring Frost in Walnut Orchards
Source: Preprints.org preprint supplement (doi:10.20944/preprints202209.0336.v1), 2022-09-22
Supplement: Supplementary file 3 [file supplementary]

**Supplementary Files:**


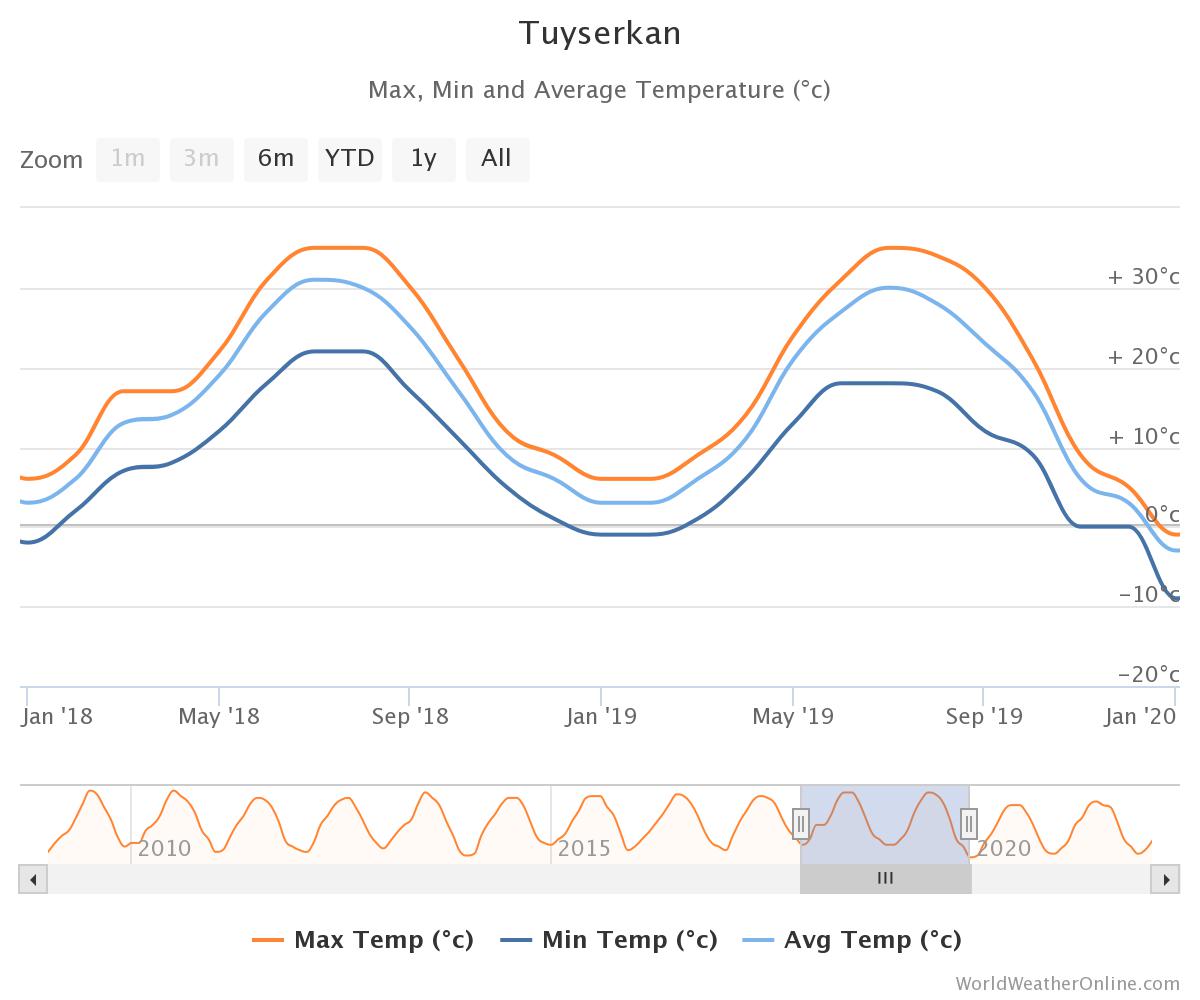


Fig S1a. Diagram of Maximum, Minimum and Average temperature of Tuyserkan in 2018 and 2019.

Source: <https://www.worldweatheronline.com>


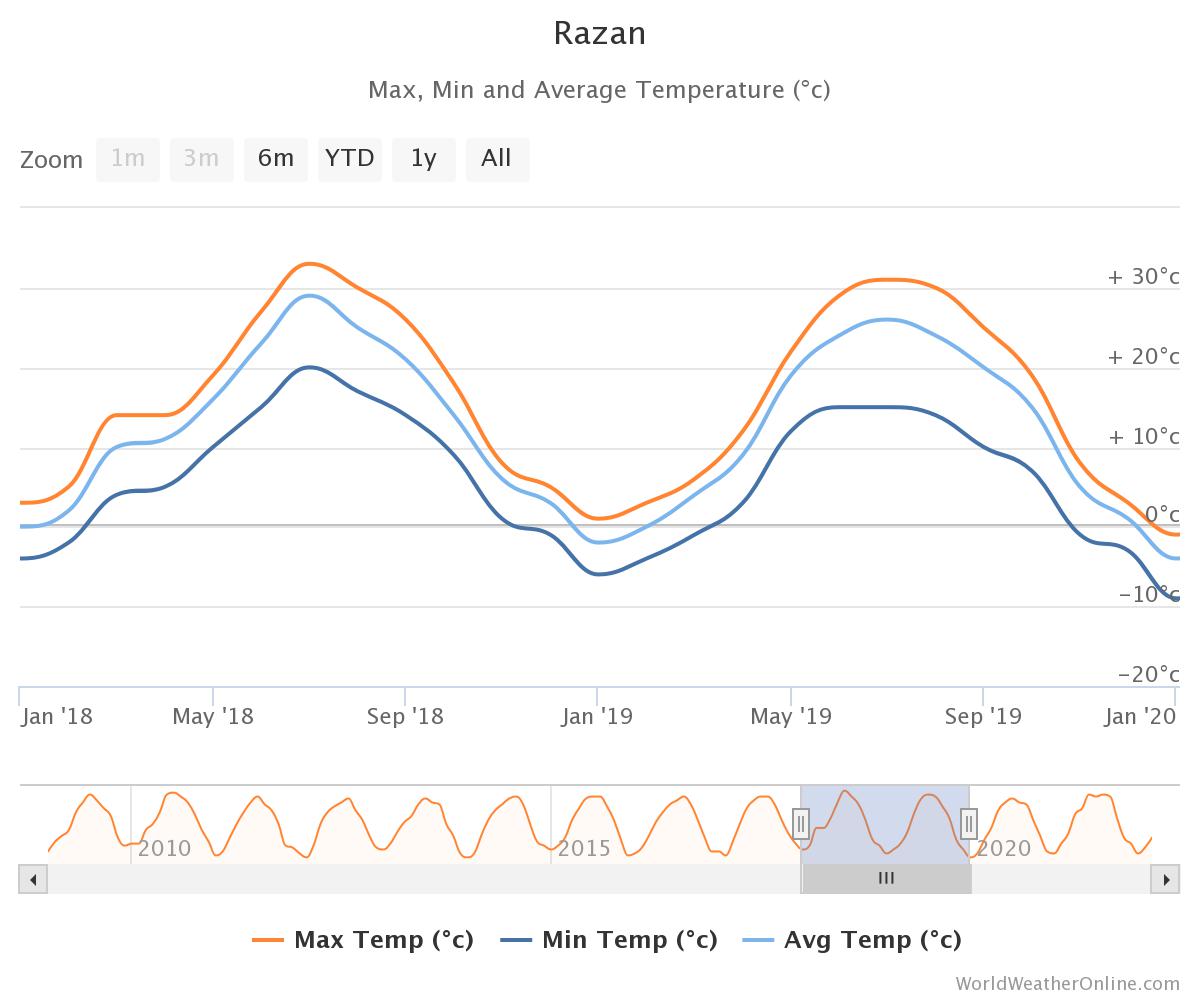


Fig S1b. Diagram of Maximum, Minimum and Average temperature of Razan in 2018 and 2019.

Source: <https://www.worldweatheronline.com>


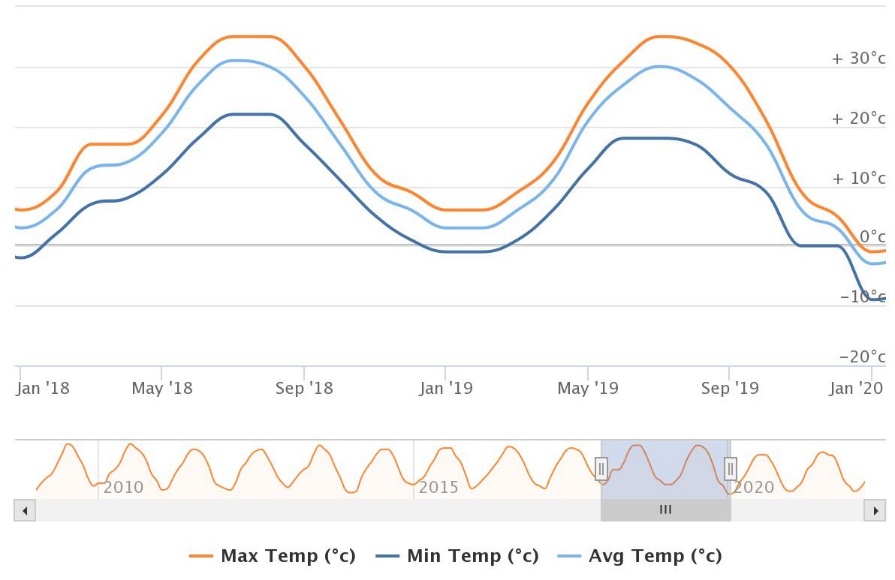


Fig S1c. Diagram of Maximum, Minimum and Average temperature of Kurzan in 2018 and 2019.

Source: <https://www.worldweatheronline.com>
